# Supplementary material for: An AMBRA1, ULK1 and PP2A regulatory network regulates cytotoxic T cell differentiation via TFEB activation
Source: PubMed Central journal article supplement — Sci Rep. 2024 Dec 30;14:31838. doi: 10.1038/s41598-024-82957-9 (PMC11685475; doi:10.1038/s41598-024-82957-9), 2024-12-30

## **Original Images for Blots**

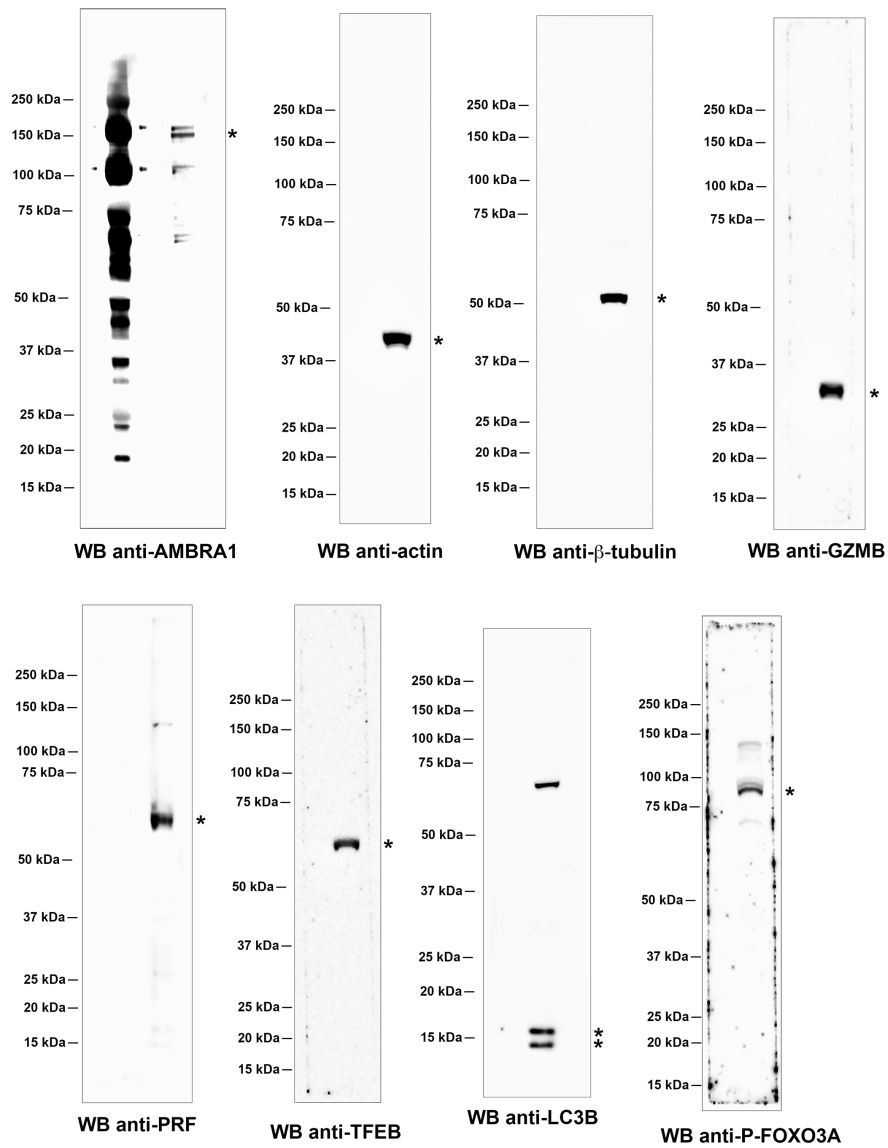

Western blot on full-length filters. Immunoblot analysis was performed on CTL lysates using all the antibodies employed in the manuscript on full-length blots. The asterisk (\*) indicates the specific bands.

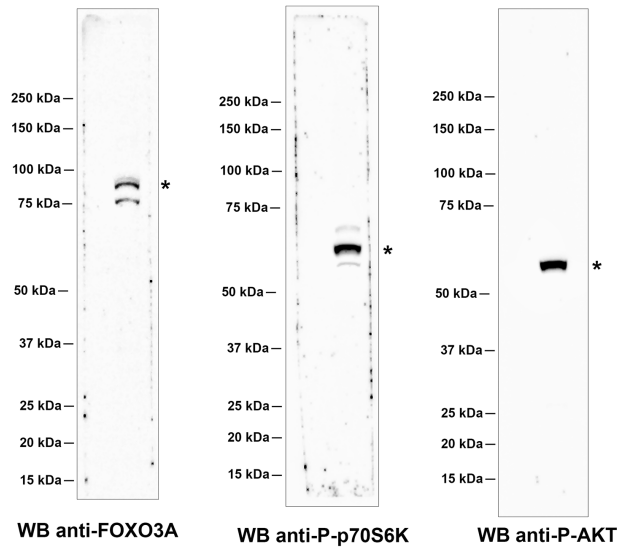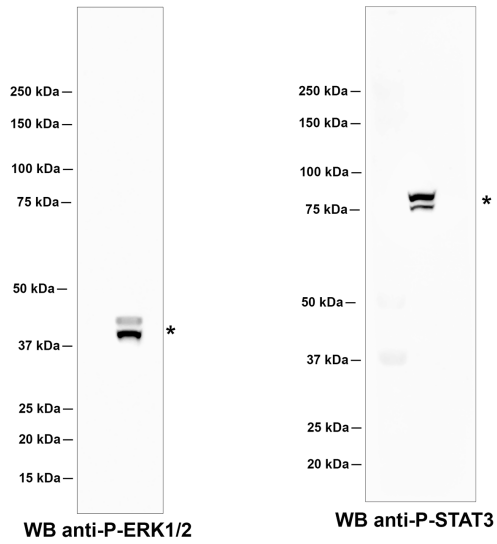

Western blot on full-length filters. Immunoblot analysis was performed on CTL lysates using all the antibodies employed in the manuscript on full-length blots. The asterisk (\*) indicates the specific bands.

Figure 1C

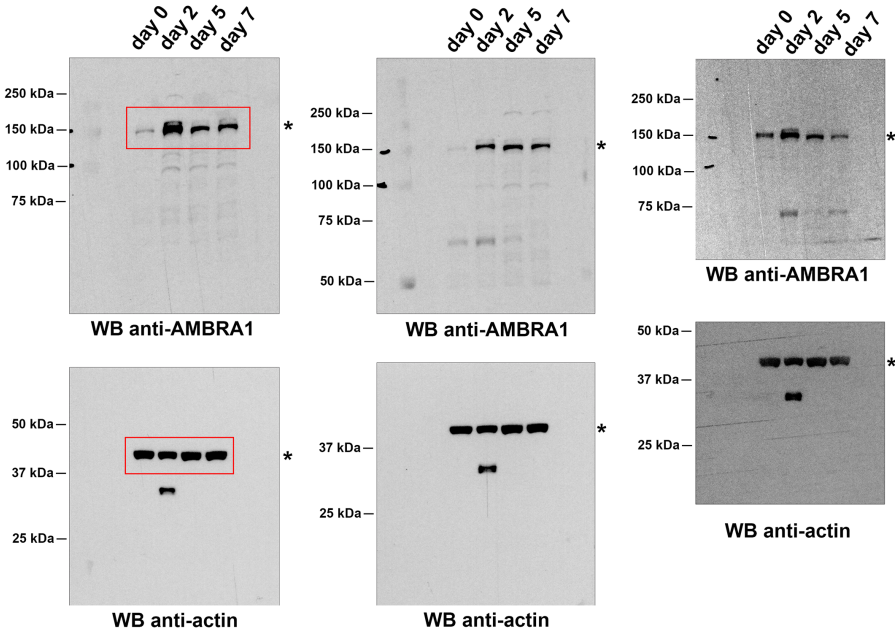

Figure 1C and S1A

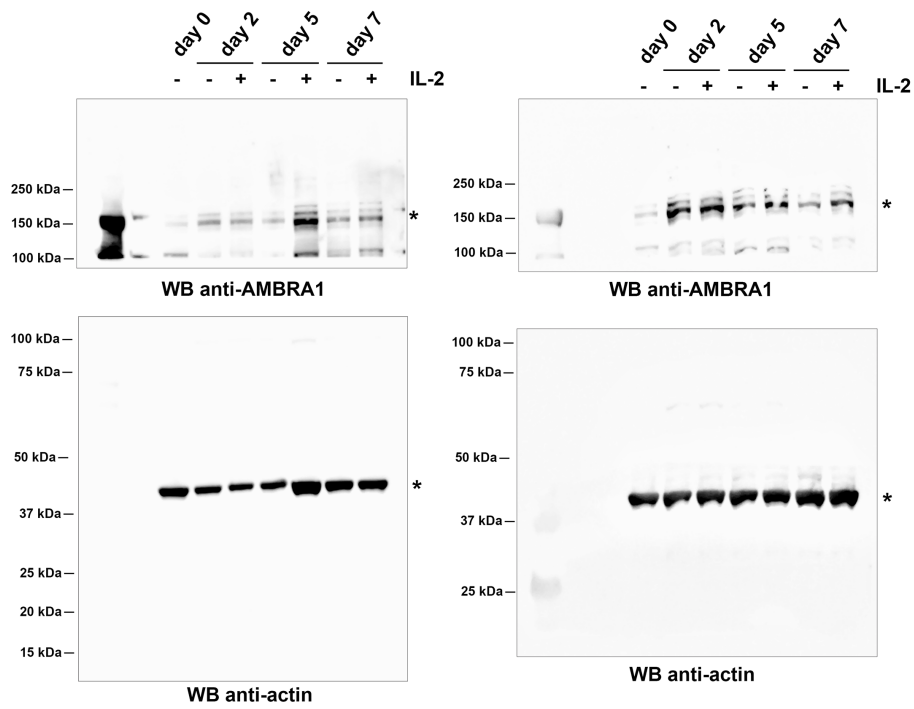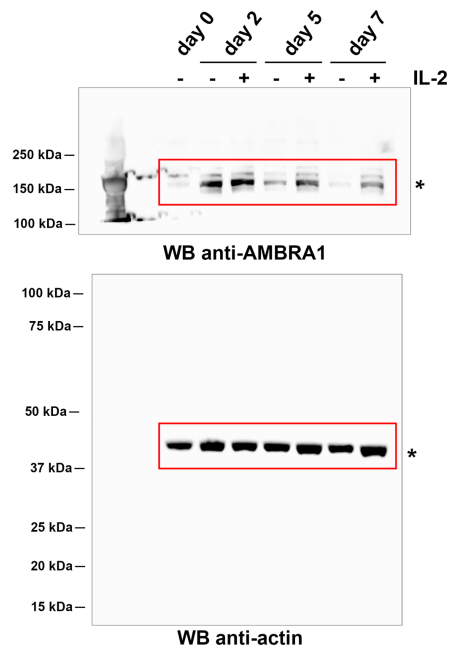

Figure 2A,D

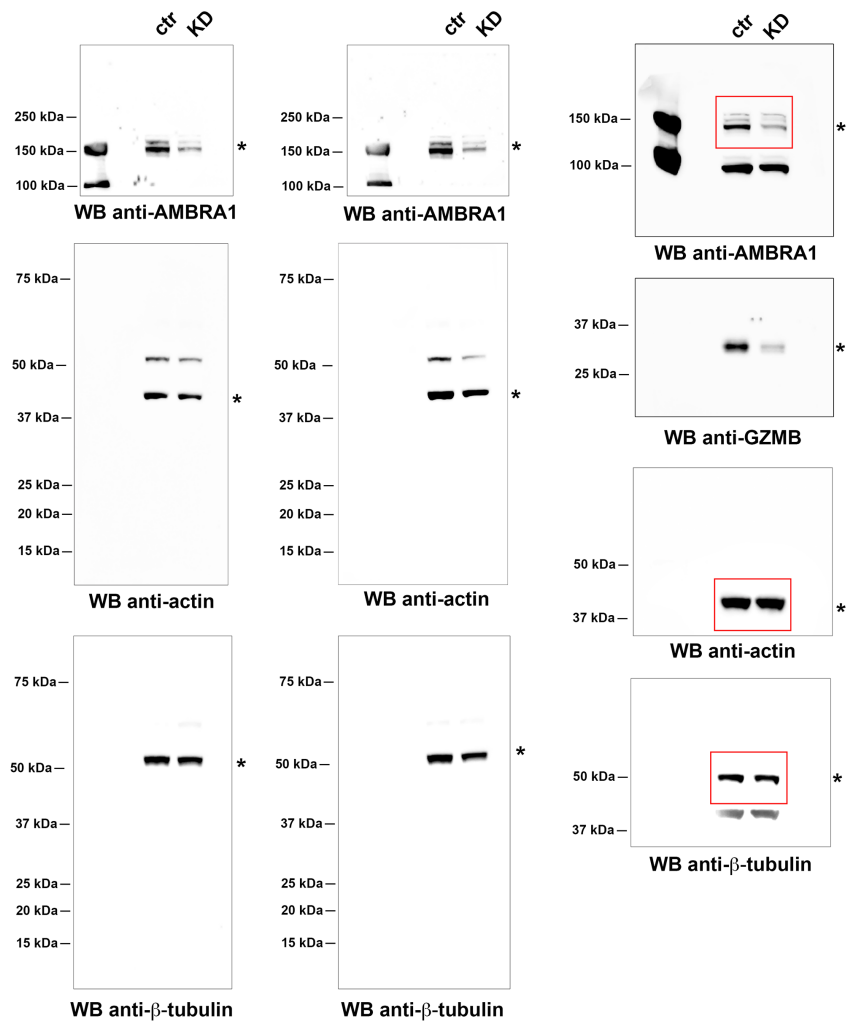

Figure 2A,D

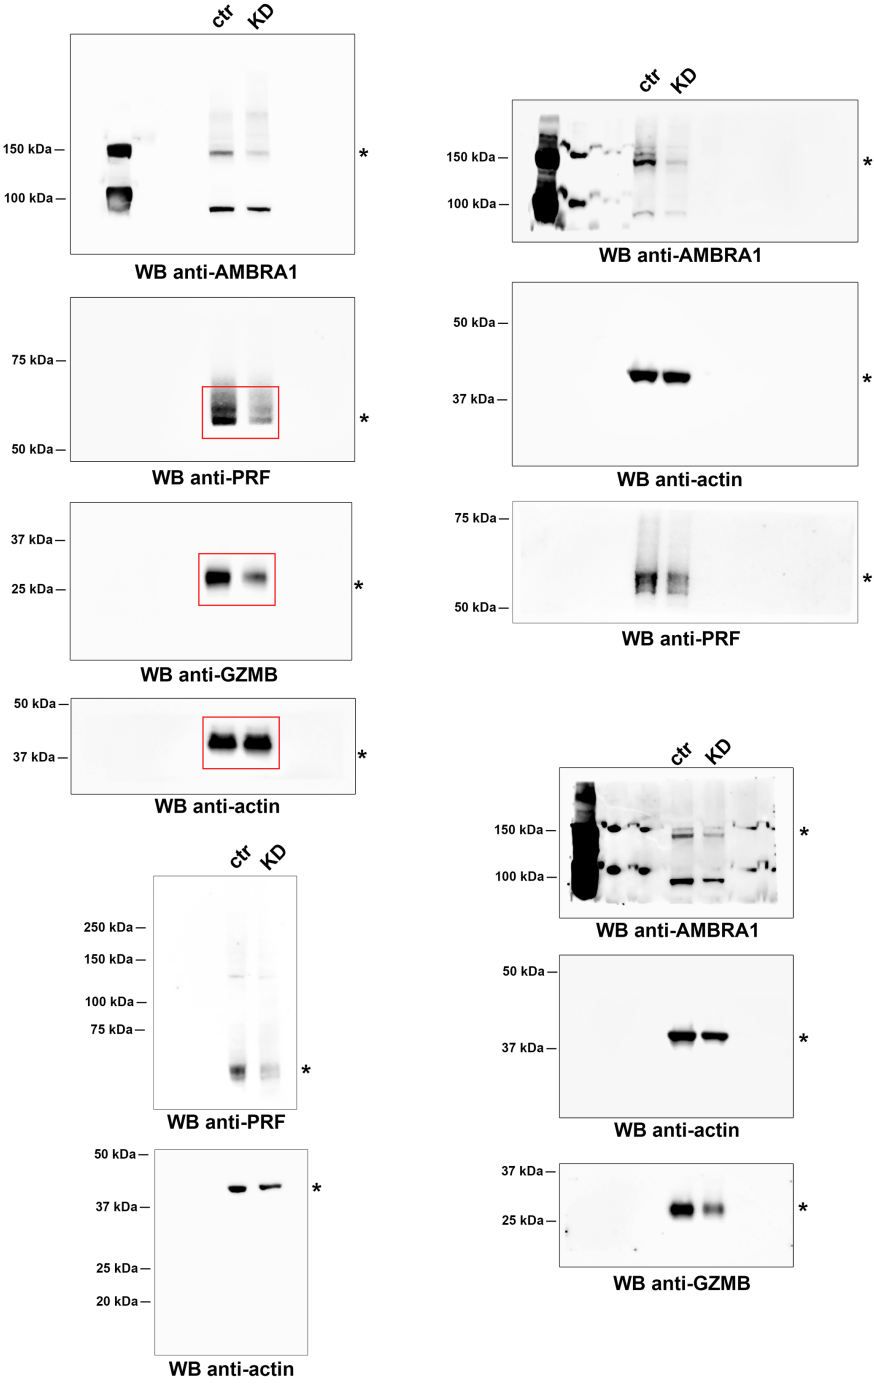

Figure 3C, 4C, S3A and S3D

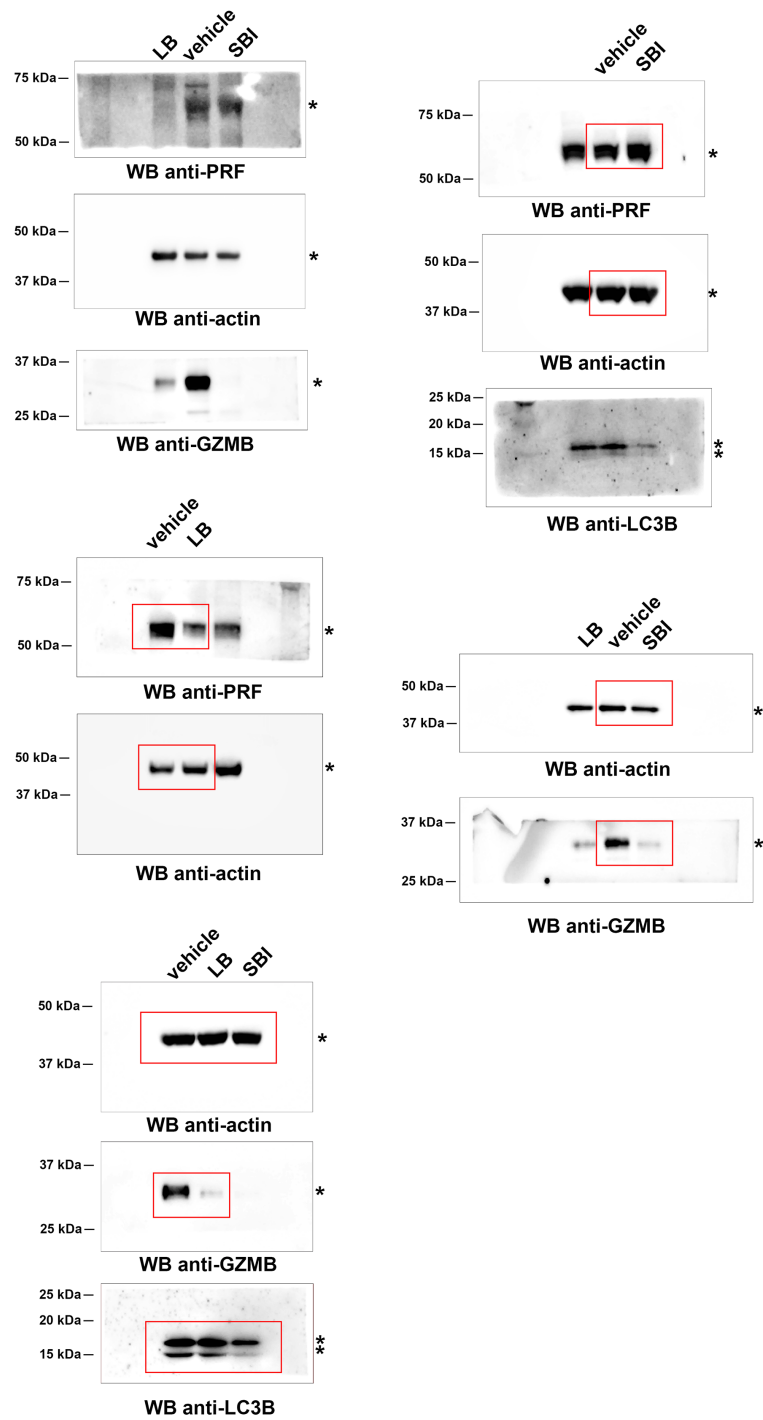



Figure 3C, 4C, S3A and S3D

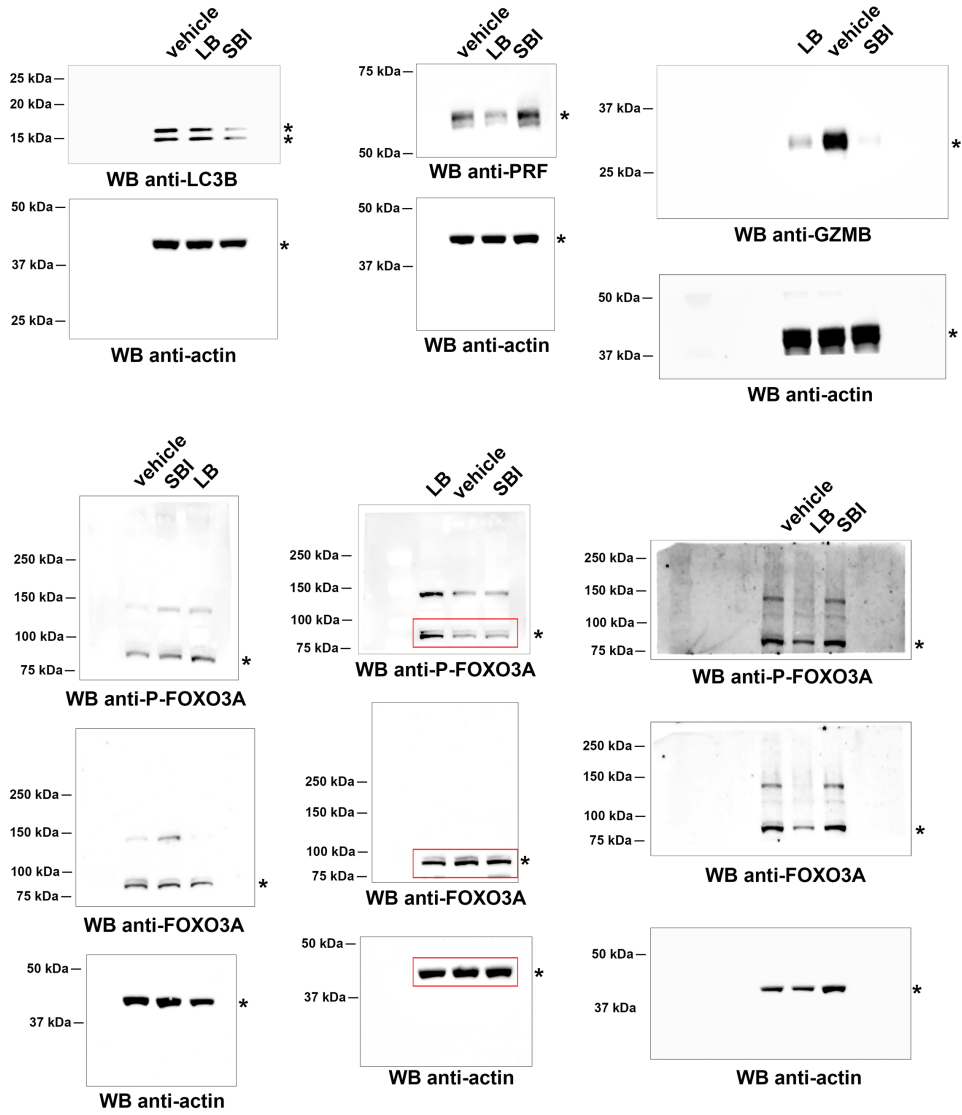

Figure 5B,D

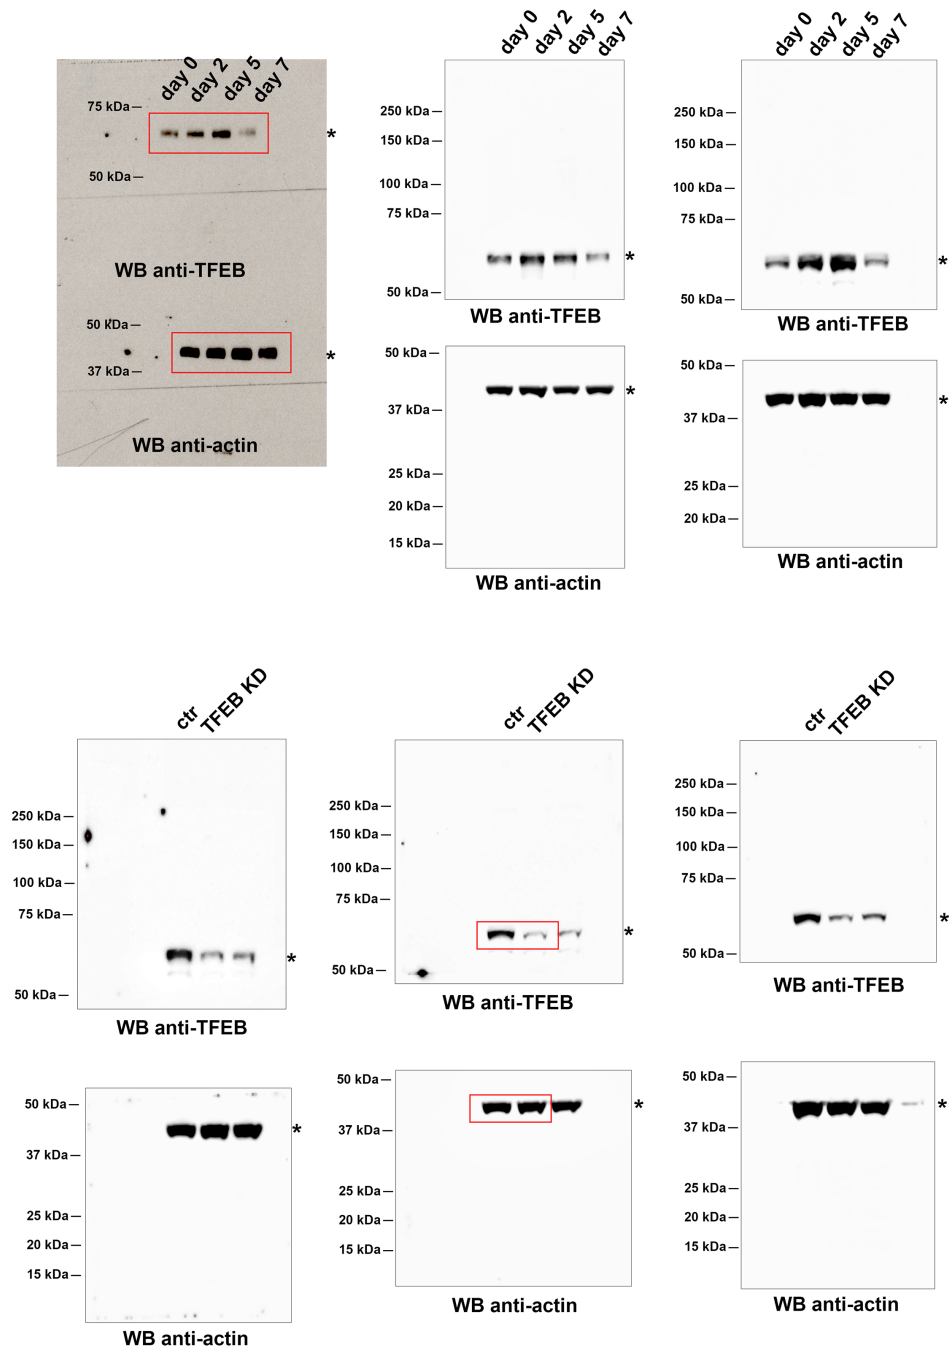

Figure S2C

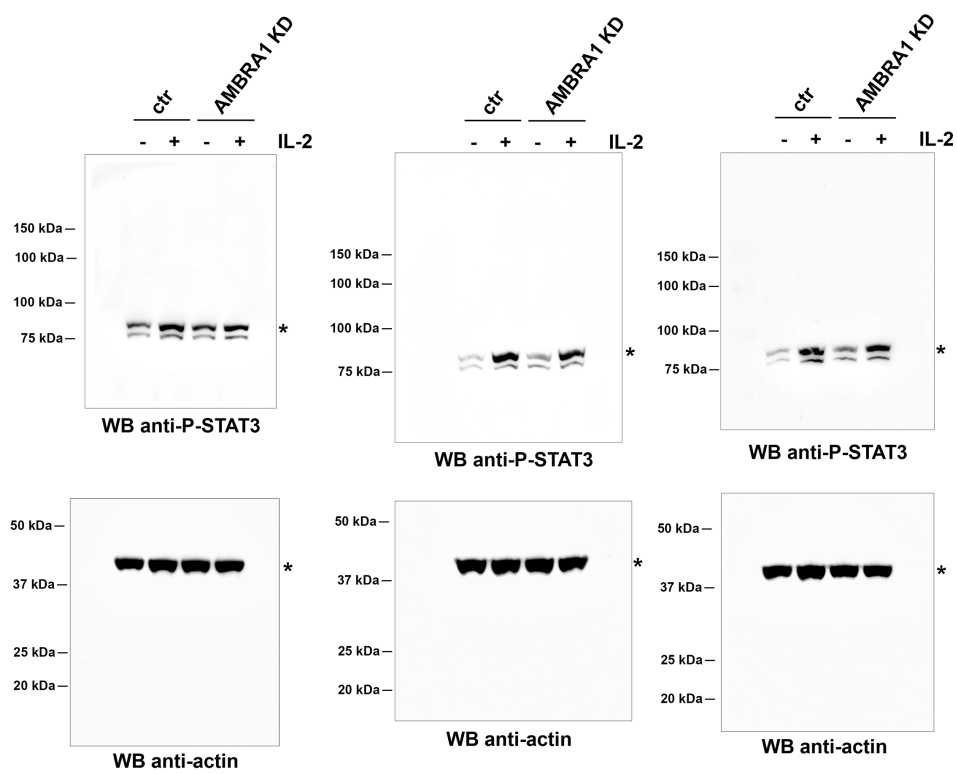

Figure S3B

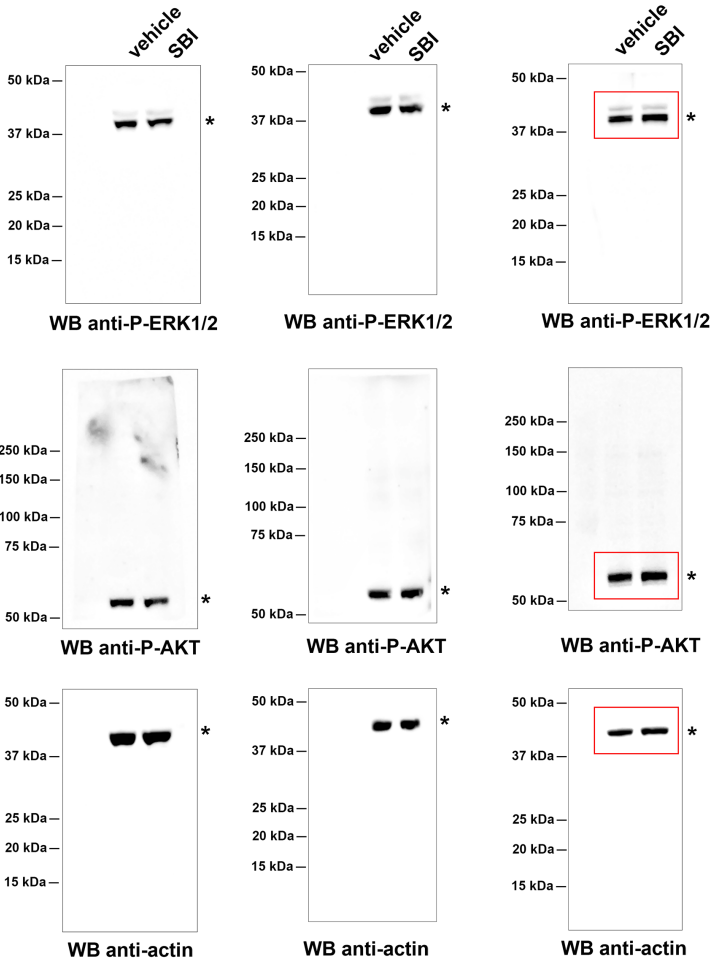

Figure S4 A,B

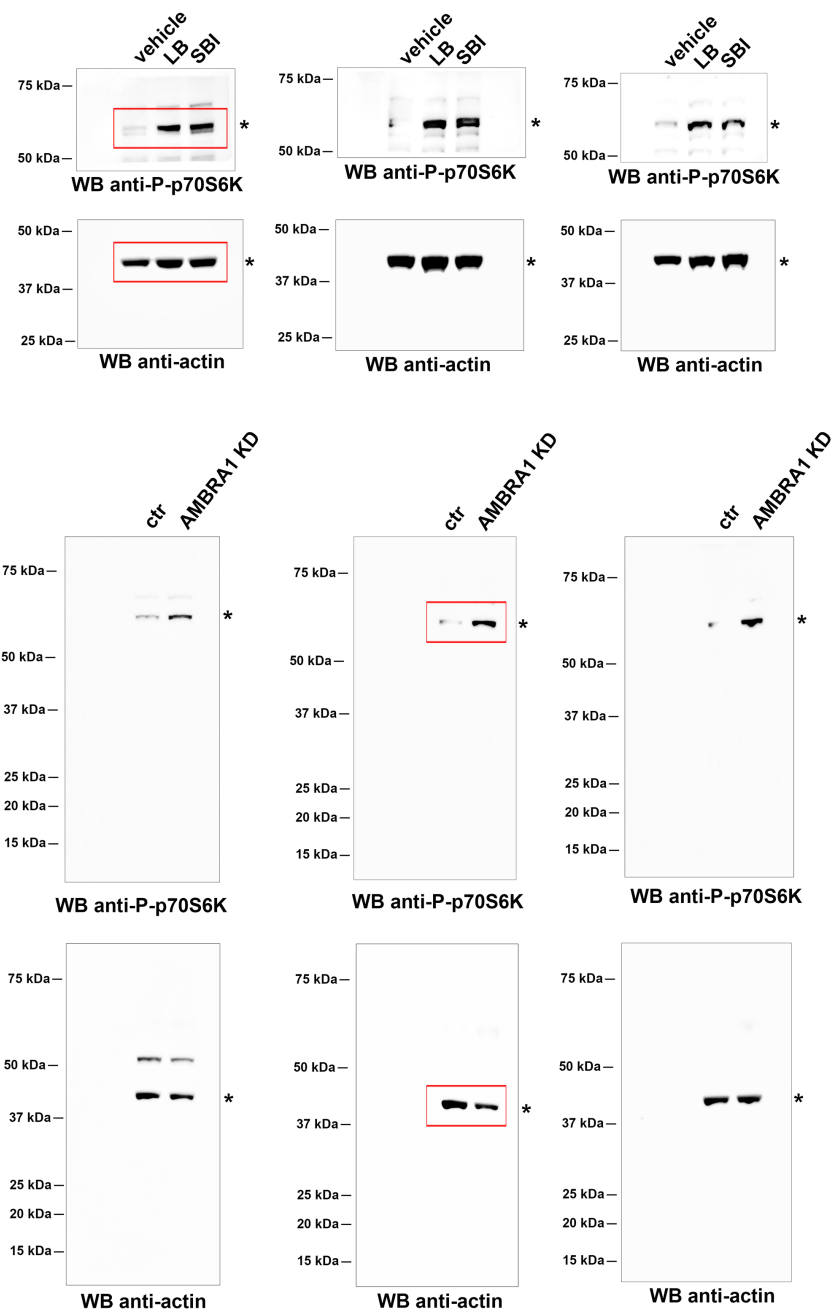

Supplement: 41598_2024_82957_MOESM2_ESM.pdf [file 41598_2024_82957_MOESM2_ESM.pdf]
